# Supplementary material for: Consumption of Ultraprocessed Food and Risk of Depression
Source: PubMed Central journal article supplement (PMC10512104; doi:10.1001/jamanetworkopen.2023.34770), 2023-09-20
Supplement: jamanetwopen-e2334770-s001.pdf [file jamanetwopen-e2334770-s001.pdf]

## Data Sharing Statement

Samuthpongton. Consumption of Ultraprocessed Food and Risk of Depression. *JAMA Netw Open*. Published September 20, 2023. doi:10.1001/jamanetworkopen.2023.34770

### Data

**Data available:** Yes

**Data types:** Deidentified participant data

**How to access data:** Access to the Nurses Health Study 2 data available upon request from Dr. Chan ([achan@mgh.harvard.edu](mailto:achan@mgh.harvard.edu))

**When available:** With publication

### Supporting Documents

**Document types:** None

### Additional Information

**Who can access the data:** researchers whose proposed use of the data has been approved

**Types of analyses:** for any purpose

**Mechanisms of data availability:** with a signed data access agreement

**Any additional restrictions:** All SAS code is available at a github link.
